# Supplementary material for: The effect of different organic solvents on sodium ion storage in carbon nanopores
Source: Royal Society of Chemistry journal article supplement (doi:10.1039/c7cp04878e), 2018-01-01
Supplement: c7cp04878e1.pdf [file c7cp04878e1.pdf]

## The effect of different organic solvents on sodium ion storage in carbon nanopores

Argyrios Karatrantos,<sup>1,2</sup> Sharif MD Khan,<sup>3</sup> Tomonori Ohba,<sup>3\*</sup> Qiong Cai<sup>1\*</sup>

1. Department of Chemical and Process Engineering, University of Surrey, Guildford GU2 7XH, UK

2. Luxemburg Institute of Science and Technology, 5, avenue des Hauts-Fourneaux, L-4362 Esch-sur-Alzette, Luxemburg

3. Graduate School of Science, Chiba University, 1-33 Yayoi, Inage, Chiba 263-8522, Japan

### Supplementary information

Table I: Number of the cations ( $\text{Na}^+$ ), anions ( $\text{PF}_6^-$ ) and different solvents: Ethyl Carbonate (EC), Ethyl Methyl Carbonate (EMC) and Propylene Carbonate (PC) in neutral carbon nanopores at different pore size 2, 3, 4 and 5nm.

| Slit width | 2 nm                 |         | 3 nm                 |         | 4 nm                 |         | 5 nm                 |         |
|------------|----------------------|---------|----------------------|---------|----------------------|---------|----------------------|---------|
|            | Na ( $\text{PF}_6$ ) | Solvent |
| EC         | 30                   | 313±22  | 45                   | 474±37  | 60                   | 631±51  | 75                   | 780±62  |
| EMC        | 30                   | 201±13  | 45                   | 311±23  | 60                   | 419±40  | 75                   | 525±45  |
| PC         | 30                   | 234±16  | 45                   | 359±21  | 60                   | 480±40  | 75                   | 596±45  |

Table II: Number of the cations ( $\text{Na}^+$ ), anions ( $\text{PF}_6^-$ ) and different solvents: Ethyl Carbonate (EC), Ethyl Methyl Carbonate (EMC) and Propylene Carbonate (PC) in charged carbon nanopores at different pore size 2, 3, 4 and 5nm.

| Slit width | 2 nm |               |         | 3 nm |               |         | 4 nm |               |         | 5 nm |               |         |
|------------|------|---------------|---------|------|---------------|---------|------|---------------|---------|------|---------------|---------|
|            | Na   | $\text{PF}_6$ | Solvent |
| EC         | 30   | 0             | 350±19  | 45   | 15            | 504±32  | 60   | 30            | 660±51  | 75   | 45            | 804±63  |
| EMC        | 30   | 0             | 225±14  | 45   | 15            | 342±31  | 60   | 30            | 483±11  | 75   | 45            | 597±16  |
| PC         | 30   | 0             | 259±15  | 45   | 15            | 395±30  | 60   | 30            | 513±40  | 75   | 45            | 620±41  |
| EC         | 50   | 0             |         |      |               |         |      |               |         |      |               |         |
| EMC        | 50   | 0             |         |      |               |         |      |               |         |      |               |         |

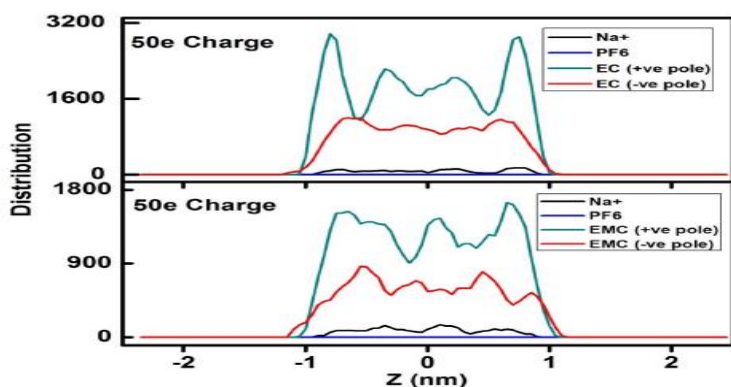

Figure S1: Density distribution along the z direction in EC, EMC. i) Carbons of EC, EMC (cyan line), ii) Carbonyl oxygen of EC, MC, iii) Na (black line), iv)  $\text{PF}_6$  (blue line), v) Na- $\text{PF}_6$  (red line). Lines are for charged nanopores of -50e respectively.

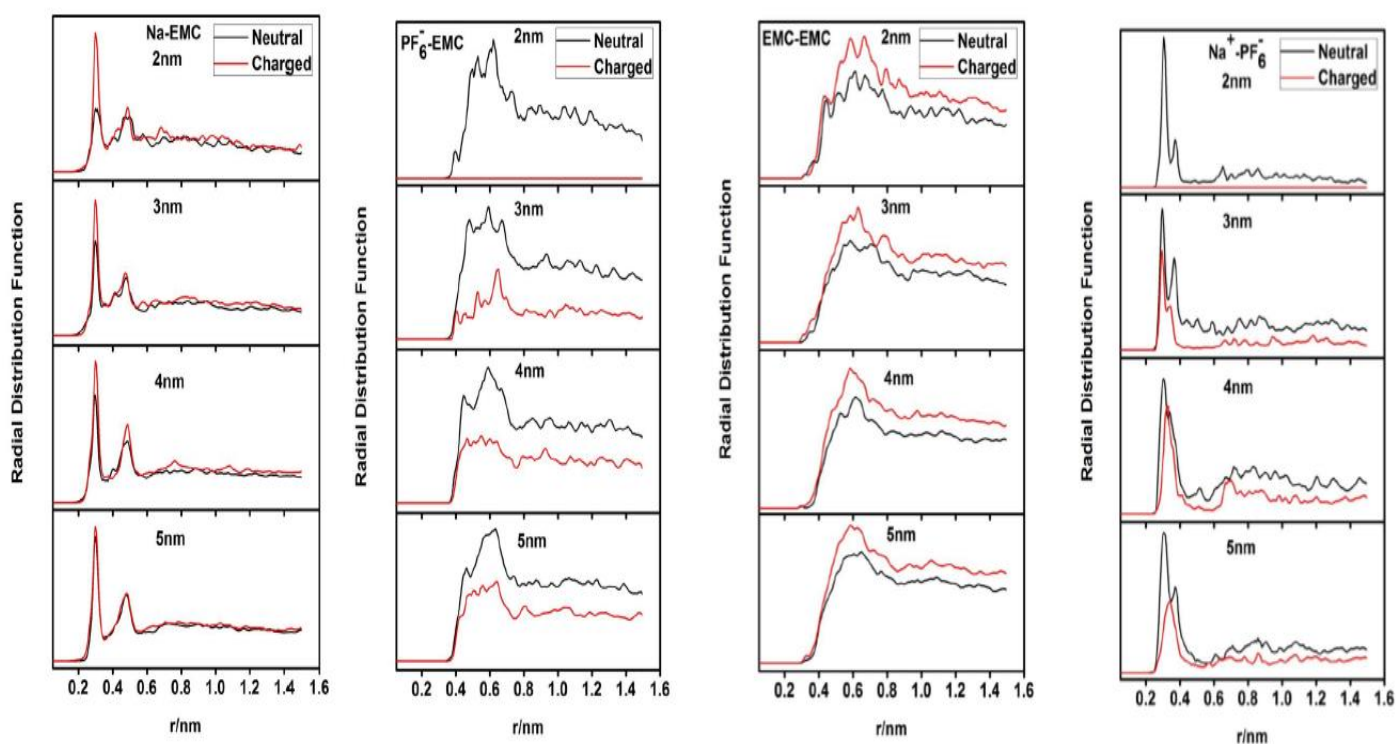

Figure S2: Density distribution along the z direction in EC, EMC. i) Carbons of EC, EMC (cyan line), ii) Carbonyl oxygen of EC, MC, iii) Na (black line), iv)  $\text{PF}_6$  (blue line), v) Na- $\text{PF}_6$  (red line). Lines are for charged nanopores of -50e respectively.
